# Supplementary material
Source: HighWire-hosted journal article supplement (https://www.cmaj.ca/content/suppl/2010/07/19/cmaj.080910)
Supplement: dizzy-dros-5-at.pdf [file dizzy-dros-5-at.pdf]

**Appendix 5 (as supplied by authors): Characteristics of 26 studies of diagnostic tests on dizziness feasible in primary care**

| Study, year (Reference)                  | Analysed participants, n (women, %) | Age mean, y (range, y) | Study Entry and Inclusion Criteria                                                            | Setting                                                                 | Target condition                            | Index test                                       | Reference standard                                                                                                    |
|------------------------------------------|-------------------------------------|------------------------|-----------------------------------------------------------------------------------------------|-------------------------------------------------------------------------|---------------------------------------------|--------------------------------------------------|-----------------------------------------------------------------------------------------------------------------------|
| <b>PSYCHIATRY, Psychogenic dizziness</b> |                                     |                        |                                                                                               |                                                                         |                                             |                                                  |                                                                                                                       |
| Persoons et al., 2003 (43)               | 97(66)                              | 48 (18–75)             | Random sample of dizzy patients referred to otorhinolaryngologist                             | Outpatient tertiary academic clinic, Belgium                            | Major Depressive Disorder                   | Depression part Patient Health Questionnaire     | MINI interview                                                                                                        |
|                                          |                                     |                        |                                                                                               |                                                                         | Panic Disorder                              | Panic disorder part Patient Health Questionnaire |                                                                                                                       |
| <b>NEURO-OTOLOGY</b>                     |                                     |                        |                                                                                               |                                                                         |                                             |                                                  |                                                                                                                       |
| <b>Questionnaires</b>                    |                                     |                        |                                                                                               |                                                                         |                                             |                                                  |                                                                                                                       |
| †Kental and Rauch, 2003 (36)             | 57 (74)                             | 47 (20–78)             | Consecutive patients with dizziness                                                           | Outpatient tertiary clinic, United States of America                    | Vertigo                                     | Dizziness questionnaire                          | Diagnosis after clinical evaluation                                                                                   |
| López-Escámez et al., 2000 (37)          | 100 (65)                            | NR                     | Non-selected (no details) patients with dizziness or vertigo                                  | Outpatient clinic, Spain                                                | Ménière's disease                           | Structured Questionnaire of Vertigo              | Criteria Ménière's disease of the American Academy of Otolaryngology, Head and Neck Surgery after 10 months follow-up |
| von Brevern et al., 2006 (24)            | 61 (51)                             | NR (18-60+)            | Consecutive patients with dizziness                                                           | Outpatient tertiary clinics, Germany                                    | Benign Paroxysmal Positional Vertigo (BPPV) | Vestibular vertigo questionnaire                 | Dix-Hallpike maneuver and/or diagnosis after clinical evaluation                                                      |
| Whitney et al., 2005 (48)                | 373 (64)                            | 61 (15-95)             | Non-selected (no details) patients with balance and/or vestibular disorder                    | Outpatient academic (physical therapy) clinic, United States of America | BPPV                                        | DHI BPPV subscore, 5 items                       | Dix-Hallpike maneuver                                                                                                 |
|                                          |                                     |                        |                                                                                               |                                                                         |                                             | DHI BPPV subscore, 2 items                       |                                                                                                                       |
| <b>Symptoms and signs</b>                |                                     |                        |                                                                                               |                                                                         |                                             |                                                  |                                                                                                                       |
| Chan, 2008 (27)                          | 88 (52)                             | 79 (median) (33-90)    | Consecutive patients with dizziness not fulfilling exclusion criteria                         | Outpatient tertiary? clinic, China                                      | BPPV                                        | Spinning                                         | Dix-Hallpike and side-lying maneuver                                                                                  |
|                                          |                                     |                        |                                                                                               |                                                                         |                                             | Episodic                                         |                                                                                                                       |
|                                          |                                     |                        |                                                                                               |                                                                         |                                             | Positional                                       |                                                                                                                       |
|                                          |                                     |                        |                                                                                               |                                                                         |                                             | Nausea/Vomiting                                  |                                                                                                                       |
| <b>Dix-Hallpike maneuver</b>             |                                     |                        |                                                                                               |                                                                         |                                             |                                                  |                                                                                                                       |
| ‡Cohen, 2004 (29)                        | 29 (NR)                             | NR (NR)                | Selected patients with vertigo provoked by head movements and referred for vestibular testing | Outpatient tertiary academic clinic, United States of America           | BPPV                                        | Dix-Hallpike maneuver                            | Battery of vestibular tests                                                                                           |
| Norré, 1994 (41)                         | 85 (61)                             | 54 (14-87)             | Selected patients with vertigo provoked by head movements                                     | Outpatient academic clinic, Belgium                                     | BPPV                                        | Dix-Hallpike maneuver                            | Battery of vestibular tests                                                                                           |
| <b>Side-lying maneuver</b>               |                                     |                        |                                                                                               |                                                                         |                                             |                                                  |                                                                                                                       |
| ‡Cohen, 2004 (29)                        | 29 (NR)                             | NR (NR)                | Selected patients with vertigo provoked by head movements and referred for vestibular testing | Outpatient tertiary academic clinic, United States of America           | BPPV                                        | Side-lying maneuver                              | Battery of vestibular tests                                                                                           |
| <b>Head shaking nystagmus</b>            |                                     |                        |                                                                                               |                                                                         |                                             |                                                  |                                                                                                                       |

|                              |                     |                      |                                                                                                |                                                                   |                                                                                           |                        |                                        |
|------------------------------|---------------------|----------------------|------------------------------------------------------------------------------------------------|-------------------------------------------------------------------|-------------------------------------------------------------------------------------------|------------------------|----------------------------------------|
| Burgio et al., 1991 (25)     | 115 (NR)            | NR (NR)              | Non-selected (no details) referred dizzy patients                                              | Outpatient academic clinic, United States of America              | Peripheral vestibular dysfunction                                                         | Head shaking nystagmus | Caloric tests and ENG                  |
| Fujimoto et al., 1993 (30)   | 1364 (58)           | 48 (8–91)            | Consecutive patients during routine ENG testing (no details)                                   | Outpatient academic clinic, Canada                                | Peripheral vestibular dysfunction                                                         | Head shaking nystagmus | >20% difference in R/L caloric testing |
| Goebel and Garcia, 1992 (31) | 214 (NR)            | 55 (median) (9 – 83) | Randomly selected dizzy patients                                                               | Outpatient tertiary clinic, United States of America              | Peripheral vestibular dysfunction                                                         | Head shaking nystagmus | Caloric tests                          |
| ‡Guidetti et al., 2006 (32)  | 661 (65)            | 55 (14-80)           | Non-selected (no details) patients with and without vertigo                                    | Outpatient tertiary academic clinic, Italy                        | Peripheral vestibular dysfunction                                                         | Head shaking nystagmus | Caloric tests                          |
| ‡Harvey et al., 1997 (34)    | 105 (67)            | 52 (13–87)           | Consecutive dizzy patients                                                                     | Outpatient tertiary academic clinic, United States of America     | Peripheral vestibular dysfunction                                                         | Head shaking nystagmus | Caloric tests                          |
| Jacobson et al., 1990 (35)   | 116 (NR)            | NR (NR)              | Consecutive dizzy patients referred for balance testing                                        | Outpatient clinic, United States of America                       | Peripheral vestibular dysfunction                                                         | Head shaking nystagmus | Battery of vestibular tests            |
| ‡Mandala et al., 2008 (38)   | 65 (37)             | 54 (13-84)           | Selected patients with vestibular neuritis                                                     | Outpatient academic clinic, Italy                                 | Peripheral vestibular dysfunction (vestibular neuritis)                                   | Head shaking nystagmus | Caloric tests                          |
| Tseng and Chao, 1997 (45)    | 258 (62)            | NR (14–79)           | Consecutive patients with dizziness or vertigo                                                 | Outpatient academic clinic, Taiwan                                | Peripheral vestibular dysfunction                                                         | Head shaking nystagmus | Caloric tests with ENG                 |
| Vicini et al., 1989 (46)     | 277 (53)            | 47 (6-83)            | No details about study entry; Referred patients with vestibular and/or neurological complaints | Outpatient (academic) clinics, Italy                              | Peripheral vestibular dysfunction<br>Central vestibular dysfunction                       | Head shaking nystagmus | Battery of vestibular tests            |
| <b>Head impulse test</b>     |                     |                      |                                                                                                |                                                                   |                                                                                           |                        |                                        |
| Beynon et al., 1998 (23)     | 150 (NR)            | 51 (13-76)           | No details about study entry; Patients with balance disorder                                   | Outpatient clinics, United Kingdom of Great Britain               | Peripheral vestibular dysfunction                                                         | Head impulse test      | Caloric test                           |
| Cnyrim et al., 2008 (28)     | 83 (53)             | 53 (NR)              | Selected patients with vertigo, nystagmus and postural imbalance                               | Outpatient academic clinics, Germany and United States of America | Peripheral vestibular dysfunction (vestibular neuritis)<br>Central vestibular dysfunction | Head impulse test      | Caloric tests with ENG and cranial MRI |
| Harvey et al., 1996 (33)     | 112 (65) (224 ears) | 53 (13–87)           | No details about study entry; dizzy patients                                                   | Outpatient academic clinic, United States of America              | Peripheral vestibular dysfunction                                                         | Head impulse test      | Caloric tests                          |
| ‡Harvey et al., 1997 (34)    | 105 (67)            | 52 (13–87)           | Consecutive dizzy patients                                                                     | Outpatient tertiary academic clinic, United States of America     | Peripheral vestibular dysfunction                                                         | Head impulse test      | Caloric tests                          |
| ‡Mandala et al.,             | 65 (37)             | 54                   | Selected patients with                                                                         | Outpatient academic                                               | Peripheral                                                                                | Head impulse test      | Caloric tests                          |

|                                           |          |            |                                                                                                                 |                                                                 |                                                                                                                            |                                            |                                            |
|-------------------------------------------|----------|------------|-----------------------------------------------------------------------------------------------------------------|-----------------------------------------------------------------|----------------------------------------------------------------------------------------------------------------------------|--------------------------------------------|--------------------------------------------|
| 2008 (38)                                 |          | (13-84)    | vestibular neuritis                                                                                             | clinic, Italy                                                   | vestibular dysfunction (vestibular neuritis)                                                                               |                                            |                                            |
| Newman-Toker et al., 2008 (40)            | 42 (35)  | 64 (26-92) | Consecutive referred patients with acute vertigo and high risk for stroke                                       | (Outpatient) tertiary academic clinic, United States of America | Peripheral vestibular dysfunction (vestibular neuritis)<br>Central vestibular dysfunction (brainstem or cerebellar stroke) | Head impulse test                          | ENG or videonystagmography and cranial MRI |
| Perez and Rama-Lopez, 2003 (42)           | 265 (50) | 50 (NR)    | Non-selected (no details) referred patients with vertigo                                                        | Outpatient academic clinic, Spain                               | Peripheral vestibular dysfunction                                                                                          | Head impulse test                          | Caloric tests                              |
| <b>Vibration induced nystagmus</b>        |          |            |                                                                                                                 |                                                                 |                                                                                                                            |                                            |                                            |
| ‡Mandala et al., 2008 (38)                | 64 (37)  | 54 (13-84) | Selected patients with vestibular neuritis                                                                      | Outpatient academic clinic, Italy                               | Peripheral vestibular dysfunction (vestibular neuritis)                                                                    | Vibration induced nystagmus                | Caloric tests                              |
| Michel et al., 2001 (39)                  | 399 (NR) | NR (NR)    | No details about study entry; Vertiginous patients and non vertiginous patients                                 | Outpatient clinics, France                                      | Peripheral vestibular dysfunction                                                                                          | Vibration induced nystagmus                | Caloric tests                              |
| <b>Cold mini caloric test</b>             |          |            |                                                                                                                 |                                                                 |                                                                                                                            |                                            |                                            |
| Weinberg and Sadé, 1984 (47)              | 124 (NR) | NR (NR)    | No details about study entry; Patients with vestibular neuronitis, Menière disease, acoustic tumor or dizziness | Outpatient clinic, Israel                                       | Peripheral vestibular dysfunction                                                                                          | Cold mini caloric test                     | Clinical diagnosis                         |
| <b>Head heave test</b>                    |          |            |                                                                                                                 |                                                                 |                                                                                                                            |                                            |                                            |
| ‡Mandala et al., 2008 (38)                | 65 (37)  | 54 (13-84) | Selected patients with vestibular neuritis                                                                      | Outpatient academic clinic, Italy                               | Peripheral vestibular dysfunction (vestibular neuritis)                                                                    | Head heave test                            | Caloric tests                              |
| <b>High-frequency oscillopsia test</b>    |          |            |                                                                                                                 |                                                                 |                                                                                                                            |                                            |                                            |
| Burgio et al., 1992 (26)                  | 115 (NR) | NR (NR)    | Non-selected (no details) referred dizzy patients                                                               | Outpatient academic clinic, United States of America            | Peripheral vestibular dysfunction                                                                                          | Oscillopsia test                           | Caloric tests and ENG                      |
| <b>Hyperventilation-induced nystagmus</b> |          |            |                                                                                                                 |                                                                 |                                                                                                                            |                                            |                                            |
| Robichaud et al., 2002 (44)               | 38 (66)  | 53 (25-72) | Selected referred dizzy patients with >25% difference in R/L caloric testing                                    | Outpatient tertiary academic clinic, Canada                     | Peripheral vestibular dysfunction                                                                                          | Hyperventilation-induced nystagmus         | Caloric tests                              |
|                                           | 24 (54)  | 58 (39-78) | Patients with acoustic neurinoma                                                                                |                                                                 | Central vestibular dysfunction                                                                                             |                                            | Cranial MRI                                |
| <b>Positional nystagmus test</b>          |          |            |                                                                                                                 |                                                                 |                                                                                                                            |                                            |                                            |
| ‡Guidetti et al., 2006 (32)               | 661 (65) | 55 (14-80) | Non-selected (no details) patients with and without vertigo                                                     | Outpatient tertiary academic clinic, Italy                      | Peripheral vestibular dysfunction                                                                                          | Positional nystagmus by direct observation | Caloric tests                              |

‡instrument for triage, not diagnostic; †the same article with two or more studied tests; NR: not reported
